# Supplementary material
Source: publisher figshare collection journal article supplement (https://frontiersin.figshare.com/ndownloader/files/22173372)
Supplement: Supplementary file [file 22173372]

## Supplementary Material

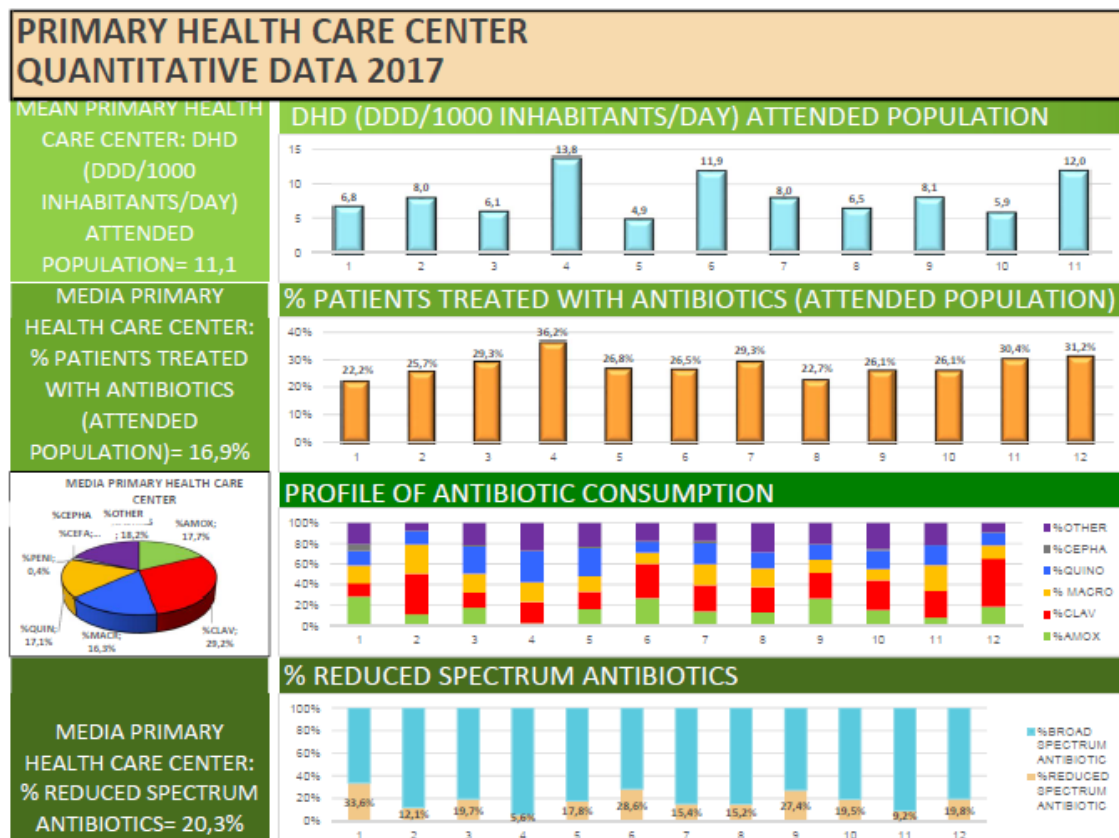

Figure 1: Sample personal feedback report sent to participating physicians every 3 months. Each number represents a prescribing physician. All physicians were informed of their number in a private message to be able to compare their performance with that of their anonymous colleagues and the center overall.

|                                                                                                                                                                                                  |
|--------------------------------------------------------------------------------------------------------------------------------------------------------------------------------------------------|
| <b>Primary Outcome</b>                                                                                                                                                                           |
| Defined daily dose per 1000 inhabitants per day (DID)                                                                                                                                            |
| <b>Secondary Outcome</b>                                                                                                                                                                         |
| a) (%) DID of narrow-spectrum antibiotics (ATC groups: J01CA. J01CE. J01CF. J01XX01) /DID of total antibiotics (J01)                                                                             |
| b) DID of amoxicillin. amoxicillin/clavulanic acid. macrolides. and quinolones                                                                                                                   |
| c) Patients treated with antibiotic in the most prevalent outpatient syndromes:                                                                                                                  |
| <b>i) Pharyngotonsillitis (PT)</b>                                                                                                                                                               |
| (%) Number of patients diagnosed with PT and treated with antibiotics / Number patients diagnosed with PT                                                                                        |
| (%)Number of patients diagnosed with PT and treated with penicillin / Number patients treated with antibiotic and with PT diagnose                                                               |
| (%) Number of patients diagnosed with PT and treated with Amoxicillin / Number patients treated with antibiotic and with PT diagnose                                                             |
| (%) Number of patients diagnosed with PT and treated with Amoxicillin/Clavulanic and diagnosed of PT/ Number patients treated with antibiotic and with PT diagnose                               |
| (%) Number of patients diagnosed with PT and treated with Macrolides / Number patients treated with antibiotic and with PT diagnose                                                              |
| <b>ii) Acute Otitis Media (AOM)</b>                                                                                                                                                              |
| (%) Number of patients diagnosed with AOM and treated with antibiotic / Number patients with AOM diagnose.                                                                                       |
| (%) Number of patients diagnosed with AOM and treated with Amoxicillin / Number patients treated with antibiotic and with AOM diagnose                                                           |
| (%) Number of patients diagnosed with AOM and treated with Amoxicillin/Clavulanic / Number patients treated with antibiotic and with AOM diagnose                                                |
| (%) Number of patients diagnosed with AOM and treated with Macrolides / Number patients treated with antibiotic and with AOM diagnose                                                            |
| (%) Number of patients diagnosed with AOM and treated with antibiotic excluding Macrolides. Amoxicillin or Amoxicillin/Clavulanic/ Number patients treated with antibiotic and with AOM diagnose |
| <b>iii) Urinary Tract Infection (UTI)</b>                                                                                                                                                        |
| (%) Number of patients diagnosed with UTI and treated with antibiotic / Number patients with UTI diagnose.                                                                                       |
| (%) Number of patients diagnosed with UTI and treated with Fosfomycin / Number patients treated with antibiotic and with UTI diagnose                                                            |
| (%) Number of patients diagnosed with UTI and treated with Amoxicillin/Clavulanic / Number patients treated with antibiotic and with UTI diagnose                                                |
| (%) Number of patients diagnosed with UTI and treated with Quinolones / Number patients treated with antibiotic and with UTI diagnose                                                            |
| <b>iv) Acute Sinusitis (ASin)</b>                                                                                                                                                                |
| (%) Number of patients diagnosed with ASin and treated with antibiotic / Number patients with AS diagnose.                                                                                       |
| <b>v) Acute Bronchitis (AB)</b>                                                                                                                                                                  |
| (%) Number of patients diagnosed with AB and treated with antibiotic / Number patients with AB diagnose.                                                                                         |
| d) Costs associated to antimicrobial consumption. ATC code J01 (Euros)                                                                                                                           |

|                                                                                                                                           |
|-------------------------------------------------------------------------------------------------------------------------------------------|
| e) (%) Population supplied with at least one antibiotic during the study periods/Total population attending the primary health care area. |
| f) Antibiotic consumption in private geriatric homes measured in Daily Define Dose per 100 bed days.                                      |

**Table 1:** Primary and secondary outcome indicators

|                                                             | Adults |        |        |                         |                         | Children (0-14 years) |        |        |                         |                         |
|-------------------------------------------------------------|--------|--------|--------|-------------------------|-------------------------|-----------------------|--------|--------|-------------------------|-------------------------|
|                                                             | 2016   | 2017   | 2018   | 2016/2018<br>Difference | Statistical<br>Analysis | 2016                  | 2017   | 2018   | 2016/2018<br>Difference | Statistical<br>Analysis |
| <b>Patients treated with antibiotics, %</b>                 | 70.94% | 71.47% | 71.40% | 0.46%                   | p=0.69                  | 51.15%                | 54.83% | 49.28% | -1.87%                  | p=0.51                  |
| <b>Patients treated with fosfomycin, %</b>                  | 39.58% | 43.22% | 45.36% | 5.78%                   | p<0.05                  | 7.46%                 | 7.86%  | 13.99% | 6.53%                   | p<0.05                  |
| <b>Patients treated with amoxicillin/clavulanic acid, %</b> | 6.15%  | 5.24%  | 4.24%  | -1.95%                  |                         | 62.44%                | 47.97% | 29.45% | -32.99%                 |                         |
| <b>Patients treated with quinolones, %</b>                  | 27.52% | 23.42% | 20.47% | -7.05%                  |                         | N/A                   | N/A    | N/A    | N/A                     |                         |
| <b>Patients treated with cefuroxime, %</b>                  | 26.76% | 28.12% | 29.93% | 3.17%                   |                         | 6.72%                 | 15.18% | 21.87% | 15.15%                  |                         |
| <b>Patients treated with other antibiotics, %</b>           | N/A    | N/A    | N/A    | N/A                     |                         | 23.38%                | 29.00% | 34.69% | -11.31%                 |                         |

**Table 2:** Percentage of patients treated with antibiotic and antibiotic choice for the treatment of urinary tract infection

N/A: Does Not Apply

|                                                                                         | Adults |        |        |                         |                         | Children (0-14 years) |        |        |                         |                         |
|-----------------------------------------------------------------------------------------|--------|--------|--------|-------------------------|-------------------------|-----------------------|--------|--------|-------------------------|-------------------------|
|                                                                                         | 2016   | 2017   | 2018   | 2016/2018<br>Difference | Statistical<br>Analysis | 2016                  | 2017   | 2018   | 2016/2018<br>Difference | Statistical<br>Analysis |
| <b>Patients diagnosed with<br/>Acute Sinusitis and treated<br/>with antibiotics, %</b>  | 77.50% | 74.99% | 68.12% | -9.38%                  | P<0.05                  | 80.64%                | 82.48% | 81.27% | 0.64%                   | P=0.37                  |
| <b>Patients diagnosed with<br/>Acute Bronchitis and<br/>treated with antibiotics, %</b> | 70.06% | 65.18% | 58.65% | -11.42%                 | P<0.05                  | 29.19%                | 27.05% | 22.78% | -6.41%                  | P<0.05                  |

**Table 3:** Percentage of patients treated with antibiotic with diagnosis of Acute Sinusitis and Acute Bronchitis

|                                         | 2016       | 2017       | 2018       | 2016/2018<br>Difference |
|-----------------------------------------|------------|------------|------------|-------------------------|
| <b>Total Antibiotic Spending</b>        | 905,700.76 | 865,630.48 | 793,765.89 | -111,934.87             |
| <b>Amoxicillin (J01CA04)</b>            | 104,627.02 | 104,604.57 | 93,728.93  | -108,98.09              |
| <b>Amoxicillin/clavulanic (J01CR02)</b> | 234,707.94 | 214,288.21 | 188,772.18 | -45,935.76              |
| <b>Macrolides (J01FA)</b>               | 185,384.74 | 176,483.27 | 15,3203.62 | -32,181.12              |
| <b>Erythromycin (J01FA01)</b>           | 1,496.08   | 1,145.48   | 590.6      | -905.48                 |
| <b>Spiramycin (J01FA02)</b>             | 273.78     | 207.09     | 210.6      | -63.18                  |
| <b>Josamycin (J01FA07)</b>              | 2,111.11   | 2,213.52   | 1,263.07   | -848.04                 |
| <b>Clarithromycin (J01FA09)</b>         | 34,059.79  | 28,562.9   | 26,338.00  | -7,721.79               |
| <b>Azithromycin (J01FA10)</b>           | 14,5730.65 | 142,568.51 | 12,3658.63 | -22,072.02              |
| <b>Quinolones (J01M)</b>                | 200,781.19 | 174,542.56 | 15,7306.02 | -43,475.17              |
| <b>Ciprofloxacin (J01MA02)</b>          | 17,613.79  | 16,151.91  | 13,780.71  | -3,833.08               |
| <b>Norfloxacin (J01MA06)</b>            | 8,961.73   | 6,981.65   | 5,071.62   | -3,890.11               |
| <b>Levofloxacin (J01MA12)</b>           | 144,907.61 | 133,235.82 | 127,482.71 | -17,424.90              |
| <b>Moxifloxacin (J01MA14)</b>           | 29,227.62  | 18,114.48  | 10,947.5   | -18,280.12              |
| <b>Fosfomycin (J01XX01)</b>             | 53,056.71  | 54,851.47  | 54,595.91  | 1,539.20                |

**Table 4: Economic analysis (euros) per year by generic names and antibiotic groups**

Figure 2: Local guideline for adult patients


**MútuaTerrassa**  
 ASSISTENCIAL  
 Atenció Primària

## PROA

### Programa d'Optimització de l'ús d'Antibiòtics

Tractament empíric de les malalties infeccioses en adults

- Per a un tractament antibiòtic empíric més racional s'han de considerar uns principis bàsics:
- Cal conèixer els microorganismes més probables de cada infecció i utilitzar antibiòtics només si hi ha sospita d'un procés d'origen bacterià, si és factible, amb el suport de proves de diagnòstic ràpid.
- En el moment de la indicació de l'antibiòtic cal valorar la seva eficàcia (espectre antibacterià), resistències, toxicitat, efectes secundaris, comoditat posològica, durada del tractament i preu.

#### INFECCIONS RESPIRATÒRIES

##### SINUSITIS AGUDA

- Iniciar tractament en pacients amb clínica lleugera i persistent de més de 10 dies o greu de 3-4 dies: Amoxicil·lina VO 750-1.000 mg / 8 h durant 7 dies.
- Si no millora a les 48 h per sospita de resistència als betalactàmics o bé infecció per *Haemophilus*: Ampliar l'espectre substituint per amoxicil·lina-clavulànic VO 875/125 mg / 8 h durant 7 dies.
- Al·lèrgics a la penicil·lina o intolerants: Levofloxacina VO 500 mg / 24 h durant 7 dies.

##### FARINGOAMIGDALITIS AGUDA

- Penicil·lina VO 500 mg / 12 h o amoxicil·lina 500 mg / 8 h durant 7 dies.
- En cas d'al·lèrgia confirmada a la penicil·lina: Es recomana clindamicina VO 300 mg / 8 h o bé macròlid de 16 àtoms (josamicina VO 500 mg / 12 h durant 7 dies).

##### OTITIS MITJANA AGUDA (OMA)

- Si no hi ha signes de gravetat ni factors de risc, no es recomana tractament antibiòtic.
- Si no millora en 48-72 h: Amoxicil·lina VO 500 mg / 8 h durant 7 dies i reavaluar en 48 h.
- Si no millora: Substituir per amoxicil·lina-clavulànic VO 875/125 mg / 8 h durant 7 dies.
- Al·lèrgics als betalactàmics: Levofloxacina VO 500 mg / 24 h durant 7 dies.

##### OTITIS EXTERNA

- Otitis externa difusa: Ciprofloxacina tòpica Q3% 2-4 gotes / 12 h durant 7 dies.
- Otitis externa circumscriu (furúncol): Fusidic cada 8 h durant 7-10 dies. Si hi ha més afectació de teixits (cel·lulitis): Amoxicil·lina-clavulànic VO 875/125 mg / 8 h durant 7 dies.
- Al·lèrgics als betalactàmics: Clindamicina VO 300 mg / 8 h durant 7 dies.
- En cas d'otímicosi o miringitis ampuflar lleu no es recomana tractament antibiòtic.
- En cas de miringitis ampuflar extensa (sospita de *Mycoplasma*): Azitromicina VO 500 mg / 24 h durant 3 dies.

##### BRONQUITIS

- Més del 90% de l'etiologia és vírica amb procés autolimitat i no requereix tractament antibiòtic.
- Si hi ha sospita clínica d'infecció per *B. pertussis*: Iniciar tractament amb Azitromicina VO 500 mg/dia el 1r dia i 250 mg/dia del 2n al 5è dia.

#### BRONQUEÏTASIS SOBREINFECTADES

- Infecció aguda sense exacerbacions: Amoxicil·lina-clavulànic VO 875/125 mg / 8 h durant 7 dies.
- Infecció aguda amb > 2 exacerbacions a l'any: Levofloxacina VO 500 mg / 24 h durant 10 dies.

#### EXACERBACIÓ EN MPQC

- FEV1 > 50 % (moderat-leu) en pacient sense comorbiditats (DM, cirrosi hepàtica, IIRC, cardiopatia isquèmica o insuficiència cardíaca): Amoxicil·lina-clavulànic VO 875/125 mg / 8 h durant 7 dies.
- Al·lèrgics a betalactàmics: Levofloxacina VO 500 mg / 24 h durant 7 dies.
- FEV1 > 50 % (moderat-leu) amb comorbiditats o > 2 exacerbacions a l'any: Amoxicil·lina-clavulànic VO 875/125 mg / 8 h durant 7 dies o Levofloxacina VO 500 mg / 24 h durant 7 dies.
- FEV1 < 50 % (greu) sense risc de *Pseudomonas aeruginosa*: Amoxicil·lina-clavulànic VO 875/125 mg / 8 h durant 7 dies o Levofloxacina VO 500 mg / 24 h durant 7 dies.
- FEV1 < 50 % (greu) amb *Pseudomonas aeruginosa*: Levofloxacina VO 500 mg / 24 h durant 10 dies.

#### PNEUMÒNIA ADQUIRIDA A LA COMUNITAT (PNAC)

PNAC amb forma de presentació típica:

- Pacient < 65 anys sense patologia de base: Amoxicil·lina VO 1 g / 8 h durant 7 dies i reavaluar en 48-72 h. Si no respon, substituir per Amoxicil·lina-clavulànic VO 875/125 mg / 8 h durant 7 dies. En cas d'al·lèrgia: Levofloxacina VO 500 mg / 24 h durant 7 dies.
- Pacient > 65 anys o amb malaltia crònica: Amoxicil·lina-clavulànic VO 875/125 mg / 8 h durant 7 dies. En cas d'al·lèrgia: Levofloxacina VO 500 mg / 24 h durant 7 dies.

#### PNAC amb forma de presentació atípica:

- Clarithromicina VO 500 mg / 12 h durant 7 dies o Azitromicina VO 500 mg / 24 h durant 3 dies.

#### PNAC amb forma de presentació indeterminada:

- Levofloxacina VO 500 mg / 24 h durant 7 dies.
- Al·lèrgics o alternativa: Amoxicil·lina-clavulànic VO 875/125 mg + Claritromicina VO 500 mg / 12 h durant 7 dies.

#### INFECCIONS GENITOURINÀRIES

##### CISTITIS NO COMPLICADA EN LA DONA

- Elecció: Fosfomicina trometamol VO 3 g, dosi única.
- Alternativa: Cefuroxima VO 250-500 mg / 12 h durant 3 dies o Ciprofloxacina VO 250-500 mg / 12 h durant 3 dies.

#### CISTITIS DE REPETICIÓ EN LA DONA

##### Reinfecció:

- < 3 episodis/any: Tractament igual que cistitis no complicada.
- ≥ 3 episodis/any: Tractament empíric: Cefuroxima VO 500 mg / 12 h durant 7 dies, prèvia recollida d'orina per a urinocultiu. En aquests casos es recomana profilaxi amb dosis baixes d'antibiòtics durant 6 mesos. Si es relaciona amb el coït cal fer profilaxi postcoïtal amb una dosi única d'antibiòtic.

##### Recidiva: Tractament segons antibiograma, de 2 a 6 setmanes.

#### CISTITIS DE LA DONA GESTANT

- Requereix urinocultiu previ al tractament antibiòtic empíric. La cistitis i la bacteriúria asintomàtica es tracten de la mateixa forma, i ens guiem per l'antibiograma.
- Fosfomicina trometamol VO 3 g, dosi única o Cefuroxima axetil VO 250-500 mg / 12 h durant 5 dies.

#### PIELONEFRITIS AGUDA NO COMPLICADA EN LA DONA

- Requereix urinocultiu previ al tractament antibiòtic empíric.
- Empíric: Cefuroxima axetil VO 500 mg / 8 h durant 10 dies.
- Dirigit: Canviar a Ciprofloxacina VO 500 mg / 12 h durant 7 dies, en funció de l'antibiograma.

#### INFECCIÓ URINÀRIA EN L'HOMME

- Les cistitis agudes es consideren complicades. Sospitar sempre pielonefritis subclínica o afectació renal complicada, per la qual cosa cal fer un urinocultiu previ al tractament.
- Les pautes curtes estan contraindicades.
- La recaiguda o infecció recurrent indica infecció crònica de la pròstata o anomalies funcionals o anatómiques de la via urinària; requereixen tractament durant 4-6 setmanes i consulta a l'uròleg.
- El 50% dels homes amb infecció recurrent i el 90% dels que tenen febre tenen afectació de la pròstata que pot evolucionar a abscess de pròstata o prostatitis bacteriana crònica.
- Cal fer un estudi urològic després del segon episodi documentat d'infecció urinària.

#### CISTITIS I PIELONEFRITIS AGUDA

- Pielonefritis complicada: Derivar a l'hospital.
- Empíric: Cefuroxima axetil VO 500 mg / 8 h durant 14 dies.
- Dirigit: Canviar a Ciprofloxacina VO 500 mg / 12 h en funció de l'antibiograma.

#### PROSTATITIS

- Tractament ambulatori si el pacient no està tòxic, edat < 65 anys i no immunodepressió. Altament, ingrés hospitalari.
- Urinocultiu i tractament antibiòtic precoc per evitar complicacions, ja que es tracta d'una malaltia greu.
- Mesures generals: repòs, hidratació, antipirètics, analgèsics i laxants.

- Prostatitis aguda no complicada: Cefuroxima axetil VO 500 mg / 8 h durant 28 dies.
- Les quinolones s'han d'utilitzar guiades per antibiograma: Ciprofloxacina VO 500 mg / 12 h durant 28 dies o Levofloxacina VO 500 mg / 24 h durant 28 dies o Ofloxacina VO 400 mg / 12 h durant 28 dies.
- Prostatitis crònica bacteriana: Allargar el tractament fins a 6-8 setmanes.
- Prostatitis complicada: Derivar a l'hospital.

#### INFECCIÓ DEL TRACTE URINARI (ITU) DEL PACIENT SONDAT

- Només es tractarà en cas d'ITU simptomàtica amb febre, dolor i tenesme vesical i recanvi de catèter. Cal fer el tractament durant 7 dies si no hi ha evidència de prostatitis o PNA, i durant 14 dies si n'hi ha.
- Tractament ambulatori: Canvi de la sonda urinària, urinocultiu i antibiograma.
- Profilaxi antibiòtica només en el canvi de sonda en pacients amb immunodepressió, traumatisme intraprocediment o antecedents d'infeccions prèvies en el context de recanvis anteriors.
- Remetre a l'hospital si hi ha signes de gravetat.
- Cefuroxima axetil VO 500 mg / 8 h durant 14 dies.
- Al·lèrgics: Ciprofloxacina VO 500 mg / 12 h durant 14 dies (però cal estar alerta al fracàs per risc de resistències).

#### BACTERIÚRIA ASIMPTOMÀTICA

Es recomana el cribatge i tractament de la bacteriúria asintomàtica només en cas de dones embarassades i abans d'una intervenció genitourinària invasiva en la qual hi hagi risc d'hemorràgia mucosa.

- Fosfomicina trometamol VO 3 g, dosi única.
- Alternatives: Amoxicil·lina-clavulànic VO 500/125 mg / 8 h durant 5 dies o Cefixima VO 400 mg / 24 h durant 5 dies o Nitrofurantoina VO 50-100 mg / 6 h durant 7 dies.

#### URETRITIS I CERVICITIS

- Ceftriaxona IM 250 mg, dosi única + Azitromicina VO 1 g, dosi única.
- Al·lèrgics als betalactàmics: es pot substituir la Ceftriaxona per Ciprofloxacina VO 500 mg, dosi única. **Alternativa a l'Azitromicina** és la Doxiciclina VO 100 mg / 12 h durant 7 dies.

#### VULVOVAGINITIS

Tricomonosi:

- Metronidazol VO 2 g, dosi única. **Alternativa:** Tinidazol VO 2g, dosi única.

Vaginosis bacteriana:

- No complicada: Metronidazol vaginal (gel 0,75%) 1 aplicació/dia, a la nit, durant 5 dies. **Alternativa:** Metronidazol VO 500 mg / 8 h durant 7 dies. **Al·lèrgics al Metronidazol:** Clindamicina vaginal (crema 2%) 5 g, a la nit, durant 7 dies.

- No complicada en l'embaràs: Metronidazol VO 250 mg / 8 h durant 7 dies.
- Candidiasi:
- No complicada: Clotrimazol vaginal (comprimits) VO 500 mg, dosi única. **Alternativa:** Fluconazol VO 150 mg, dosi única.
- No complicada en l'embaràs: Clotrimazol vaginal (crema 2%) 5 g durant 7 dies.

#### INFECCIONS DE LA PELL

- Com a norma general, cal cobertura de *S. aureus* i *S. pyogenes*.
- En infeccions superficials, poc extenses, pot fer-se servir un antibiòtic tòpic com retapamulina o àcid fusidic.

#### CEL·LULITIS

- Amoxicil·lina-clavulànic VO 875/125 mg / 8 h durant 7 dies.
- Al·lèrgics: Clindamicina VO 600 mg / 8 h durant 7 dies.

#### IMPETIGEN

- Tòpic: Fusidic cada 8 h durant 7-10 dies.
- Oral: Amoxicil·lina-clavulànic VO 500/125 mg / 8 h durant 7-10 dies. **Alternativa:** Clindamicina VO 300 mg / 8 h durant 7-10 dies.
- Impetigen no ampuflar: s'acostuma a resoldre espontàniament sense tractament i sense cicatriu en 2 setmanes. El tractament accelera la seva resolució. En cas d'impetigen de repetició, la descolonització nasal amb antibiòtics tòpics (Mupirocina, 3 cops/dia durant 2-5 dies) pot disminuir-ne la freqüència.

#### FOLLICULITIS (*S. aureus*)

El tractament dels factors predisponents pot resoldre la situació: Falta d'higiene, humitat, oclusió, saunes (P. aeruginosa, candida) o ús perllongat d'antibiòtics (acne). En Foliculitis o Furunculosis de repetició, la descolonització tòpica nasal pot disminuir-ne la freqüència.

#### MOSSEGADES

- Amoxicil·lina-clavulànic VO 500/125 mg / 8 h durant 5 dies.
- Alternativa: Levofloxacina VO 500 mg / 24 h + Clindamicina VO 300 mg / 8 h durant 5 dies.

#### INFECCIONS DENTALS

##### ABSCESS PERIAPICAL

- Amoxicil·lina-clavulànic VO 875/125 mg / 8 h durant 7 dies.
- Al·lèrgic als betalactàmics: Clindamicina VO 300 mg / 6 h durant 7 dies o Azitromicina VO 500 mg / 24 h durant 3 dies.



Figure 3: Local guideline for pediatric patients

|                                                                                                                                                                                                                                                                                                                                                                                                                                                                                                                                                                                                                                                                                                                                                                                                                                                                                                                                                                                                            |                                                                                                                                                                                                                                                                                                                                                                                                                                                                                                                                                                                                                                                                                                                                                                                                                                                                                                                                                                                                                                                                                                                                                                                                                                                                                                                                                                                                                                                                                                                                                                                                                                                                                                                                                                                                                                                                                                                                                                                                                                                                                                                                                                                                                                                                                                                                                                                                                                                                                                                                                                                                                                                                                                                                                                                                                                                                                                                                                                                                                                                                                                                                                                                                                                                                                                                                                                                                                                                                                                                                                                                                                                                                                                                                                                                                                                                                                                                                                                                                                                                                                                                                                                                                                                                                                                                                                                                                                                                                                                                                                                                                                                                                                                                                                                                                                                                                                                                                                                                                                                                                                                                                                                                                                                                                                                                                                                                                                                                                                                                                                                                                                                                                                                                                                                                                                                                                                                                                                                                                                                                                                                                                                                                                                                                                                                                                                                                                                                                                                                                                                                                                                                                                                                                                                                                                                                                                                                                                                                                                                                                                                                                                                                                                                                                                                                                                                                                                                                                                                                                                                                                                                                                                                                                                                                                                                                                                                                                                                                                                                                                                                                                                                                                                                                                                                                                                                                                                                                                                                                                                                                                                                                                                                                                                                                                                                                                                                                                                                                                                                                                                                                                                                                                                                                                                                                                                                                                                                                                                                                                                                                                                                                                                                                                                                                                                                                                                                                                                                                                                                                                                                                                                                                                                                                                                                                                                                                                                                                                                                                                                                                                                                                                                                                                                                                                                                                                                                                                                                                 |
|------------------------------------------------------------------------------------------------------------------------------------------------------------------------------------------------------------------------------------------------------------------------------------------------------------------------------------------------------------------------------------------------------------------------------------------------------------------------------------------------------------------------------------------------------------------------------------------------------------------------------------------------------------------------------------------------------------------------------------------------------------------------------------------------------------------------------------------------------------------------------------------------------------------------------------------------------------------------------------------------------------|-----------------------------------------------------------------------------------------------------------------------------------------------------------------------------------------------------------------------------------------------------------------------------------------------------------------------------------------------------------------------------------------------------------------------------------------------------------------------------------------------------------------------------------------------------------------------------------------------------------------------------------------------------------------------------------------------------------------------------------------------------------------------------------------------------------------------------------------------------------------------------------------------------------------------------------------------------------------------------------------------------------------------------------------------------------------------------------------------------------------------------------------------------------------------------------------------------------------------------------------------------------------------------------------------------------------------------------------------------------------------------------------------------------------------------------------------------------------------------------------------------------------------------------------------------------------------------------------------------------------------------------------------------------------------------------------------------------------------------------------------------------------------------------------------------------------------------------------------------------------------------------------------------------------------------------------------------------------------------------------------------------------------------------------------------------------------------------------------------------------------------------------------------------------------------------------------------------------------------------------------------------------------------------------------------------------------------------------------------------------------------------------------------------------------------------------------------------------------------------------------------------------------------------------------------------------------------------------------------------------------------------------------------------------------------------------------------------------------------------------------------------------------------------------------------------------------------------------------------------------------------------------------------------------------------------------------------------------------------------------------------------------------------------------------------------------------------------------------------------------------------------------------------------------------------------------------------------------------------------------------------------------------------------------------------------------------------------------------------------------------------------------------------------------------------------------------------------------------------------------------------------------------------------------------------------------------------------------------------------------------------------------------------------------------------------------------------------------------------------------------------------------------------------------------------------------------------------------------------------------------------------------------------------------------------------------------------------------------------------------------------------------------------------------------------------------------------------------------------------------------------------------------------------------------------------------------------------------------------------------------------------------------------------------------------------------------------------------------------------------------------------------------------------------------------------------------------------------------------------------------------------------------------------------------------------------------------------------------------------------------------------------------------------------------------------------------------------------------------------------------------------------------------------------------------------------------------------------------------------------------------------------------------------------------------------------------------------------------------------------------------------------------------------------------------------------------------------------------------------------------------------------------------------------------------------------------------------------------------------------------------------------------------------------------------------------------------------------------------------------------------------------------------------------------------------------------------------------------------------------------------------------------------------------------------------------------------------------------------------------------------------------------------------------------------------------------------------------------------------------------------------------------------------------------------------------------------------------------------------------------------------------------------------------------------------------------------------------------------------------------------------------------------------------------------------------------------------------------------------------------------------------------------------------------------------------------------------------------------------------------------------------------------------------------------------------------------------------------------------------------------------------------------------------------------------------------------------------------------------------------------------------------------------------------------------------------------------------------------------------------------------------------------------------------------------------------------------------------------------------------------------------------------------------------------------------------------------------------------------------------------------------------------------------------------------------------------------------------------------------------------------------------------------------------------------------------------------------------------------------------------------------------------------------------------------------------------------------------------------------------------------------------------------------------------------------------------------------------------------------------------------------------------------------------------------------------------------------------------------------------------------------------------------------------------------------------------------------------------------------------------------------------------------------------------------------------------------------------------------------------------------------------------------------------------------------------------------------------------------------------------------------------------------------------------------------------------------------------------------------------------------------------------------------------------------------------------------------------------------------------------------------------------------------------------------------------------------------------------------------------------------------------------------------------------------------------------------------------------------------------------------------------------------------------------------------------------------------------------------------------------------------------------------------------------------------------------------------------------------------------------------------------------------------------------------------------------------------------------------------------------------------------------------------------------------------------------------------------------------------------------------------------------------------------------------------------------------------------------------------------------------------------------------------------------------------------------------------------------------------------------------------------------------------------------------------------------------------------------------------------------------------------------------------------------------------------------------------------------------------------------------------------------------------------------------------------------------------------------------------------------------------------------------------------------------------------------------------------------------------------------------------------------------------------------------------------------------------------------------------------------------------------------------------------------------------------------------------------------------------------------------------------------------------------------------------------------------------------------------------------------------------------------------------------------------------------------------------------------------------------------------------------------------------------------------------------------------------------------------------------------------------------------------------------------------------------------------------------------------------------------------------------------------------------------------------------------------------------------------------------------------------------------------------------------------------------------------------------------------------------------------------------------------------------------------------------------------------------------------------------------------------------------------------------------------------------------------------------------------------------------------------------------------------------------------------------------------------|
| <div>  <b>MútuaTerrassa</b><br/> ASSISTENCIAL<br/> Atenció Primària </div> <div> <b>PROA</b><br/> <b>Programa</b><br/> <b>d'Optimització de</b><br/> <b>l'ús d'Antibiòtics</b> </div> <div> Tractament empíric de les<br/> malalties infeccioses en<br/> <b>infants</b> </div> <div> <ul style="list-style-type: none"> <li>Per a un tractament antibiòtic empíric més racional s'han de considerar uns principis bàsics:</li> <li>Cal conèixer els microorganismes més probables de cada infecció i utilitzar antibiòtics només si hi ha sospita d'un procés d'origen bacterià, si és factible, amb el suport de proves de diagnòstic ràpid.</li> <li>En el moment de la indicació de l'antibiòtic cal valorar la seva eficàcia (espectre antibacterià), resistències, toxicitat, efectes secundaris, comoditat posològica, durada del tractament i preu.</li> </ul> </div> <div> 1-2020(5)   12/ 2016   id: 8259 </div> | <div> <b>INFECCIONS ORL</b> </div> <div> <b>FARINGOAMIGDALITIS AGUDA (FA)</b><br/> - Penicil·lina VO 50 mg/kg/d, c/ 8-12 h (500 mg c/ 8-12 h en adolescents), VO, x 10 d.<br/> - Amoxicil·lina 40 mg/kg/d, c/ 8-12 h (500 mg c/ 8-12 h en adolescents), VO, x 10 d.<br/> - Penicil·lina G benzatínica: 600.000 UI &lt; 27 kg, IM, dosi única.<br/> 1.200.000 UI &gt; 27 kg, IM, dosi única. </div> <div> <b>Alternatives:</b><br/> Al·lèrgia a la penicil·lina no immediata:<br/> - Cefadroxil 30 mg/kg/d, c/ 12-24 h, VO, x 10 d.<br/> Al·lèrgia a la penicil·lina immediata:<br/> - Claritromicina 15 mg/kg/d, c/ 12 h, VO, x 10 d. </div> <div> <b>FA recurrent:</b><br/> - Amoxicil·lina-clavulànic 40 mg/kg/d, c/ 8 h, VO, x 3-5 d.<br/> - Cefuroxima 30 mg/kg/d, c/ 12 h, VO, x 10 d.<br/> - Clindamicina 30 mg/kg/d, c/ 8 h, VO, x 10 d. </div> <div> <b>OTITIS MITJANA AGUDA (OMA)</b><br/> - Amoxicil·lina 90 mg/kg/d, c/ 8 h, VO, x 7 d.<br/> Si &lt; 6 mesos, OMA recorrent (&lt; 1 mes), evolució desfavorable i/o afectació greu, d'elecció: Amoxicil·lina-clavulànic (8:1) 90 mg/kg/d, c/ 8 h, x 7-10 d. </div> <div> <b>Alternatives:</b><br/> Al·lèrgia a la penicil·lina no immediata:<br/> - Cefuroxima 30 mg/kg/d, c/ 12 h, VO, x 7 d.<br/> Al·lèrgia a la penicil·lina immediata:<br/> - Claritromicina 15 mg/kg/d, c/ 12 h, VO, x 7 d.<br/> Si hi ha sospita de pneumococ al·lèrgia alment resident o necessitat d'ingrés:<br/> - Ceftriaxona 50 mg/kg/d, c/ 12-24 h, IM/EV, x 3-5 d. </div> <div> <b>ADENOIDITIS / SINUSITIS AGUDA</b><br/> - Amoxicil·lina 90 mg/kg/d, c/ 8 h, VO, x 10-14 d.<br/> Si hi ha complicacions:<br/> - Amoxicil·lina-clavulànic 90 mg/kg/d, c/ 8 h, VO, x 10-14 d.<br/> o Cefuroxima axetil 30 mg/kg/d, c/ 12 h, VO, x 10-14 d.<br/> <b>Alternativa (al·lèrgia als betalactàmics):</b><br/> - Claritromicina 15 mg/kg/d, c/ 12 h, VO, x 10-14 d. </div> <div> <b>Si cal tractament EV (ingrés hospitalari):</b><br/> - Amoxicil·lina-clavulànic 100 mg/kg/d, c/ 6-8 h.<br/> - Cefuroxima 100 mg/kg/d, c/ 8 h. </div> <div> <b>Si hi ha afectació greu:</b><br/> - Cefotaxima 150 mg/kg/d, c/ 8 h, EV + Vancomicina 40 mg/kg/d, c/ 6 h, EV. </div> <div> <b>OTITIS EXTERNA</b><br/> <b>Difusa:</b><br/> - Solució de Ciprofloxacina al 0,3% 2-4 gotes c/ 8-12 h, x 5-7 d.<br/> <b>Si hi ha cel·lulitis periauricular o furúncol:</b><br/> - Amoxicil·lina-clavulànic 40 mg/kg/d, c/ 8 h, VO, x 7 d. </div> <div> <b>MASTOIDITIS</b> (requereix ingrés hospitalari)<br/> - Cefotaxima 150 mg/kg/d, c/ 8 h, EV, x 10-15 d.<br/> <b>Alternativa (al·lèrgia als betalactàmics):</b><br/> - Vancomicina 40 mg/kg/d + Aztreonam 100 mg/kg/d, c/ 8 h, EV. </div> <div> <b>Si hi ha afectació greu:</b><br/> - Vancomicina 40 mg/kg/d + Aztreonam 100 mg/kg/d, c/ 8 h, EV. </div> <div> <b>ABSCÉS DENTAL</b><br/> - Amoxicil·lina-clavulànic 40 mg/kg/d, c/ 8 h, VO, x 7-10 d.<br/> - Clindamicina 30 mg/kg/d, c/ 8 h, VO, x 7-10 d.<br/> - Amoxicil·lina 40 mg/kg/d, c/ 8 h, VO + Metronidazole 30 mg/kg/d, c/ 8 h, VO, x 7-10 d. </div> <div> <b>TOS FERINA</b><br/> <b>Nens &lt; 6 mesos:</b><br/> - Azitromicina 10 mg/kg/d en 1 única dosi, VO, x 5 d.<br/> <b>Nens 6 m - 14 anys:</b><br/> - 1r dia: azitromicina 10 mg/kg/d (màxim 500 mg), VO.<br/> - 2n-5è dia: 5 mg/kg/d (màxim 250 mg). </div> <div> <b>CONJUNTIVITIS BACTERIANA</b><br/> - Col·liri antibiòtic (Eritromicina, Gentamicina, Tobramicina, Trimetoprim-polimixina B: inicialment 1 gota / 3 h i posteriorment c/ 6-8 h) + pomada nocturna 1 setmana o fins 3 d després que marxin els símptomes. </div> <div> <b>INFECCIONS DE PELL I TEIXIT CEL·LULAR SUBCUTANI</b> </div> <div> <b>IMPETIGEN</b><br/> <b>Tòpic:</b><br/> - Fusidic c/ 8 h, x 7-10 d. </div> <div> <b>Oral:</b><br/> - Cefadroxil 30 mg/kg/d, c/ 12 h, x 7-10 d.<br/> <b>Alternativa:</b><br/> - Amoxicil·lina-clavulànic 40 mg/kg/d, c/ 8 h, x 7-10 d. </div> <div> <b>MOSSEGADA</b><br/> <b>Si és superficial:</b><br/> - Amoxicil·lina-clavulànic 40 mg/kg/d, c/ 8 h, VO, x 5-7 d.<br/> <b>Si és ampla o profunda (ingrés hospitalari):</b><br/> - Amoxicil·lina-clavulànic 100 mg/kg/d, c/ 6-8 h, EV, x 7-14 d.<br/> <b>Alternativa (afectació important):</b><br/> - Cefotaxima 150 mg/kg/d + Clindamicina 30 mg/kg/d, EV, x 7-14 d. </div> <div> <b>CEL·LULITIS</b><br/> <b>Qualsevol localització:</b><br/> - Cefadroxil 30 mg/kg/d, c/ 12 h, VO, x 7-10 d.<br/> <b>Alternativa:</b><br/> - Amoxicil·lina-clavulànic 50 mg/kg/d, c/ 8 h, VO, x 7-10 d.<br/> <b>Si cal tractament EV (ingrés hospitalari):</b><br/> - Amoxicil·lina-clavulànic 100 mg/kg/d, c/ 6-8 h.<br/> <b>Si hi ha afectació greu:</b><br/> - Cloxacil·lina 100 mg/kg/d, c/ 6 h, EV + Cefotaxima 150 mg/kg/d, c/ 8 h, EV. </div> <div> <b>Periorbitària (preseptal):</b><br/> <b>Amb porta d'entrada (pell, conjuntiva):</b><br/> <b>Si cal ingrés hospitalari:</b><br/> - Amoxicil·lina-clavulànic 100-150 mg/kg/d, c/ 8 h, IV, x 7-10 d.<br/> - Cloxacil·lina 100 mg/kg/d, c/ 6 h, IV, x 7-10 d.<br/> <b>Alternatives:</b><br/> - Clindamicina 30 mg/kg/d, c/ 8 h, EV.<br/> - Vancomicina 40 mg/kg/d, c/ 6 h, EV. </div> <div> <b>Si és tractament domiciliari (&gt; 2 anys, afectació lleu):</b><br/> - Amoxicil·lina-clavulànic 80 mg/kg/d, c/ 8 h, VO, x 7-10 d. </div> <div> <b>Sense porta d'entrada (ingrés hospitalari):</b><br/> - Amoxicil·lina-clavulànic 100-150 mg/kg/d, c/ 8 h, EV, x 7-10 d.<br/> - Cefotaxima 100-150 mg/kg/d, c/ 8 h, EV, x 7-10 d. </div> <div> <b>INFECCIONS PULMONARS</b> </div> <div> <b>PNEUMONIES: DURADES DE TRACTAMENT</b><br/> No complicades: 7 d.<br/> Pneumococ o Haemophilus: 7-10 d. Micoplasmes i clamidies: 10-14 d. SGB: 10-14 d. S. aureus: 4-8 setm. (mínim, 14-21 d, EV). Empiema: tractament EV mínim 7-10 d. </div> <div> <b>PNEUMÒNIA EXTRAHOSPITALÀRIA</b><br/> <b>D1 A 3 MESOS (INGRÉS HOSPITALARI)</b><br/> - Ampicil·lina 200 mg/kg/d, c/ 6-8 h, EV + Cefotaxima 150 mg/kg/d, c/ 6-8 h, EV, x 7-10 d.<br/> <b>Si hi ha sospita de S. aureus:</b><br/> - Associar Cloxacil·lina 100-150 mg/kg/d, c/ 6 h, IV, o Vancomicina 40 mg/kg/d, c/ 6-8 h, EV, x 10-14 d.<br/> <b>Si hi ha sospita de C. trachomatis:</b><br/> - Eritromicina 40 mg/kg/d, c/ 6 h, EV, x 14-21 d, o Claritromicina VO o N, o Azitromicina. </div> <div> <b>DE 3 MESOS A 4 ANYS</b><br/> <b>Pneumònia típica:</b><br/> Menors de 6 mesos:<br/> - Amoxicil·lina-clavulànic 80-90 mg/kg/d, c/ 8 h, VO, x 7-10 d.<br/> Majors de 6 mesos:<br/> - Amoxicil·lina 90 mg/kg/d, c/ 8 h, VO, x 7-10 d. </div> <div> <b>Alternatives (al·lèrgia als betalactàmics):</b><br/> Al·lèrgia a la penicil·lina no immediata:<br/> - Cefuroxima 30 mg/kg/d, c/ 12 h, VO, x 10 d.<br/> Al·lèrgia immediata:<br/> - Azitromicina 10 mg/kg/d, c/ 24 h, VO, x 5 d. </div> <div> <b>Pneumònia atípica:</b><br/> No cal tractament antibiòtic (alta probabilitat vírica).<br/> Si clínica suggestiva, valorar macròlids (Azitromicina 10 mg/kg/d, c/ 24 h, x 5 d). </div> <div> <b>MAJORS DE 4 ANYS</b><br/> <b>Pneumònia típica:</b><br/> - Amoxicil·lina 90 mg/kg/d, c/ 8 h, VO, x 10 d.<br/> - Amoxicil·lina-clavulànic 90 mg/kg/d, c/ 8 h, VO, x 10 d.<br/> <b>Si cal tractament per via parenteral:</b><br/> - Ampicil·lina 200 mg/kg/d, c/ 6 h, EV. </div> <div> <b>Alternativa:</b><br/> - Cefotaxima 150 mg/kg/d, c/ 8 h, EV. </div> <div> <b>Si hi ha sospita de S. aureus:</b><br/> - Associar Ampicil·lina amb Cloxacil·lina 100 mg/kg/d, c/ 6 h, o Vancomicina 40 mg/kg/d, c/ 6 h. </div> <div> <b>Pneumònia atípica:</b><br/> - Azitromicina 10 mg/kg/d (1a dosi); després 5 mg/kg/d, c/ 24 h, x 5 d. </div> <div> <b>Si cal tractament per via parenteral:</b><br/> - Azitromicina 10 mg/kg/d, c/ 24 h, x 5 d. </div> <div> <b>Si el quadre és greu:</b><br/> - Associar Cefotaxima 150-200 mg/kg/d, EV + Azitromicina 10 mg/kg/d, c/ 24 h +/- Cloxacil·lina 100 mg/kg/d, c/ 6 h, EV. </div> <div> <b>INFECCIONS URINÀRIES</b> </div> <div> <b>CISTITIS</b><br/> - Cefuroxima axetil 30 mg/kg/d, c/ 8-12 h, VO, x 5-7 d.<br/> - Nitrofurantoina 5-7 mg/kg/d, c/ 6 h, VO, x 5-7 d. </div> <div> <b>Alternativa:</b><br/> - Fosfomicina trometamol 2 g en dosi única en &gt; 6 anys. En lactants, tractar com pielonefritis per via oral. </div> <div> <b>PIELONEFRITIS</b><br/> <b>Menor de 3 mesos:</b><br/> - Cefotaxima 100-150 mg/kg/d, c/ 6-8 h, EV + Ampicil·lina 100-150 mg/kg/d, c/ 6-8 h, EV. </div> <div> <b>Alternativa:</b><br/> - Amoxicil·lina-clavulànic 100 mg/kg/d, c/ 6-8 h, EV. </div> <div> <b>Major de 3 mesos:</b><br/> <b>Si hi ha ingrés hospitalari:</b><br/> - Amoxicil·lina-clavulànic 100 mg/kg/d, c/ 6-8 h, EV.<br/> - Gentamicina 5-7 mg/kg/d, c/ 8-24 h, EV. </div> <div> <b>Tractament ambulatori</b><br/> - Cefixima 90 mg/kg/d, c/ 12-24 h, VO, x 10 d. </div> <div> <b>INFECCIONS GASTROINTESTINALS</b> </div> <div> <b>GASTROENTERITIS AGUDA (GEA)</b><br/> Com a norma general, no cal tractament antibiòtic. Considerar antibiòtic si GEA enteroinvasiva i algun dels criteris següents:<br/> - Menor de 3 mesos.<br/> - Afectació important de l'estat general.<br/> - Immunodeficiències, drepanocitosi, malaltia intestinal crònica, insuficiència renal, diabetis melítus, malnutrició greu o infecció sistèmica.<br/> - Ceftriaxona 50-75 mg/kg/d, c/ 12-24 h, EV, x 3-5 d.<br/> - Cefotaxima 100-200 mg/kg/d, c/ 6-8 h, EV, x 3-5 d.<br/> - Cotrimoxazole (TMP 10 mg/kg/d), c/ 12 h, VO, x 3-5 d. </div> <div> <b>Si Campylobacter jejuni:</b><br/> - Azitromicina 10 mg/kg/d, c/ 24 h, VO, x 5 d. </div> <div> <b>Si GEA associada a les d'antibiòtics:</b><br/> - Suspendre tractament antibiòtic previ i associar Vancomicina VO o Metronidazole VO. </div> <div> <b>PARÀSITS INTESINALS</b><br/> <b>Protozoaris (més freqüents):</b><br/> <b>Giardia lamblia:</b><br/> - Metronidazole (Flagyl®) 15 mg/kg/d, c/ 8 h, VO, x 7-10 d.<br/> - Paromomicina (Humatin®) 25-35 mg/kg/d, c/ 8 h, VO, x 7-10 d.<br/> <b>Entamoeba histolytica/dispar (colitis amebiana):</b><br/> - Paromomicina (Humatin®) 25-35 mg/kg/d, c/ 8 h, VO, x 7-10 d + Metronidazole 30-50 mg/kg/d, c/ 8 h, VO, x 10 d (dosi màxima: 2 g). </div> <div> <b>Dientamoeba fragilis:</b><br/> - Metronidazole 15 mg/kg/d, c/ 8 h, VO, x 7-10 d.<br/> - Paromomicina 25-35 mg/kg/d, c/ 8 h, VO, x 7-10 d. </div> <div> <b>Blastocystis hominis:</b><br/> - Metronidazole 15 mg/kg/d, c/ 8 h, VO, x 10 d. </div> <div> <b>Helminths:</b><br/> <b>Enterobius vermicularis (oxiúria):</b><br/> - Mebendazole 100 mg en dosi única VO i repetir tractament en 2 setmanes.<br/> <b>Trichuris trichiura i Ascaris lumbricoides:</b><br/> - Mebendazole 100 mg/d, c/ 12 h, VO, x 3 d.<br/> <b>Taenia solium i T. saginata (tenias intestinal):</b><br/> - Praziquantel (Biltricide®) 5-10 mg/kg/d, dosi única, VO. </div> <div> <b>PROA</b><br/> <b>infants</b> </div> |
|------------------------------------------------------------------------------------------------------------------------------------------------------------------------------------------------------------------------------------------------------------------------------------------------------------------------------------------------------------------------------------------------------------------------------------------------------------------------------------------------------------------------------------------------------------------------------------------------------------------------------------------------------------------------------------------------------------------------------------------------------------------------------------------------------------------------------------------------------------------------------------------------------------------------------------------------------------------------------------------------------------|-----------------------------------------------------------------------------------------------------------------------------------------------------------------------------------------------------------------------------------------------------------------------------------------------------------------------------------------------------------------------------------------------------------------------------------------------------------------------------------------------------------------------------------------------------------------------------------------------------------------------------------------------------------------------------------------------------------------------------------------------------------------------------------------------------------------------------------------------------------------------------------------------------------------------------------------------------------------------------------------------------------------------------------------------------------------------------------------------------------------------------------------------------------------------------------------------------------------------------------------------------------------------------------------------------------------------------------------------------------------------------------------------------------------------------------------------------------------------------------------------------------------------------------------------------------------------------------------------------------------------------------------------------------------------------------------------------------------------------------------------------------------------------------------------------------------------------------------------------------------------------------------------------------------------------------------------------------------------------------------------------------------------------------------------------------------------------------------------------------------------------------------------------------------------------------------------------------------------------------------------------------------------------------------------------------------------------------------------------------------------------------------------------------------------------------------------------------------------------------------------------------------------------------------------------------------------------------------------------------------------------------------------------------------------------------------------------------------------------------------------------------------------------------------------------------------------------------------------------------------------------------------------------------------------------------------------------------------------------------------------------------------------------------------------------------------------------------------------------------------------------------------------------------------------------------------------------------------------------------------------------------------------------------------------------------------------------------------------------------------------------------------------------------------------------------------------------------------------------------------------------------------------------------------------------------------------------------------------------------------------------------------------------------------------------------------------------------------------------------------------------------------------------------------------------------------------------------------------------------------------------------------------------------------------------------------------------------------------------------------------------------------------------------------------------------------------------------------------------------------------------------------------------------------------------------------------------------------------------------------------------------------------------------------------------------------------------------------------------------------------------------------------------------------------------------------------------------------------------------------------------------------------------------------------------------------------------------------------------------------------------------------------------------------------------------------------------------------------------------------------------------------------------------------------------------------------------------------------------------------------------------------------------------------------------------------------------------------------------------------------------------------------------------------------------------------------------------------------------------------------------------------------------------------------------------------------------------------------------------------------------------------------------------------------------------------------------------------------------------------------------------------------------------------------------------------------------------------------------------------------------------------------------------------------------------------------------------------------------------------------------------------------------------------------------------------------------------------------------------------------------------------------------------------------------------------------------------------------------------------------------------------------------------------------------------------------------------------------------------------------------------------------------------------------------------------------------------------------------------------------------------------------------------------------------------------------------------------------------------------------------------------------------------------------------------------------------------------------------------------------------------------------------------------------------------------------------------------------------------------------------------------------------------------------------------------------------------------------------------------------------------------------------------------------------------------------------------------------------------------------------------------------------------------------------------------------------------------------------------------------------------------------------------------------------------------------------------------------------------------------------------------------------------------------------------------------------------------------------------------------------------------------------------------------------------------------------------------------------------------------------------------------------------------------------------------------------------------------------------------------------------------------------------------------------------------------------------------------------------------------------------------------------------------------------------------------------------------------------------------------------------------------------------------------------------------------------------------------------------------------------------------------------------------------------------------------------------------------------------------------------------------------------------------------------------------------------------------------------------------------------------------------------------------------------------------------------------------------------------------------------------------------------------------------------------------------------------------------------------------------------------------------------------------------------------------------------------------------------------------------------------------------------------------------------------------------------------------------------------------------------------------------------------------------------------------------------------------------------------------------------------------------------------------------------------------------------------------------------------------------------------------------------------------------------------------------------------------------------------------------------------------------------------------------------------------------------------------------------------------------------------------------------------------------------------------------------------------------------------------------------------------------------------------------------------------------------------------------------------------------------------------------------------------------------------------------------------------------------------------------------------------------------------------------------------------------------------------------------------------------------------------------------------------------------------------------------------------------------------------------------------------------------------------------------------------------------------------------------------------------------------------------------------------------------------------------------------------------------------------------------------------------------------------------------------------------------------------------------------------------------------------------------------------------------------------------------------------------------------------------------------------------------------------------------------------------------------------------------------------------------------------------------------------------------------------------------------------------------------------------------------------------------------------------------------------------------------------------------------------------------------------------------------------------------------------------------------------------------------------------------------------------------------------------------------------------------------------------------------------------------------------------------------------------------------------------------------------------------------------------------------------------------------------------------------------------------------------|
